# Supplementary material for: Zymomonas diversity and potential for biofuel production
Source: PubMed Central journal article supplement (PMC8088579; doi:10.1186/s13068-021-01958-2), 2021-05-01
Supplement: 13068_2021_1958_MOESM2_ESM.pdf [file 13068_2021_1958_MOESM2_ESM.pdf]

*R. sp4P02\_1*/Chain 

*R. sp4P02\_1*/Chain  
francensis  
ATTC10988  
CU1  
CU1rif2  
uvs51  
B23394  
Z6  
B4492  
PROIMIA1  
NCIMB11163  
CP1  
B1960  
ATCC31822  
CP4  
B12526  
CP3

*R. sp4P02\_1*/Chain 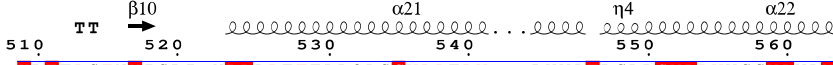

*R. sp4P02\_1*/Chain  
francensis  
ATTC10988  
CU1  
CU1rif2  
uvs51  
B23394  
Z6  
B4492  
PROIMIA1  
NCIMB11163  
CP1  
B1960  
ATCC31822  
CP4  
B12526  
CP3

*R. sp4P02\_1*/Chain 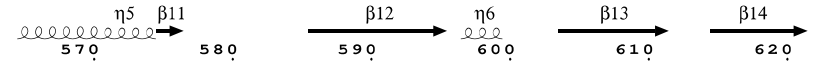

*R. sp4P02\_1*/Chain  
francensis  
ATTC10988  
CU1  
CU1rif2  
uvs51  
B23394  
Z6  
B4492  
PROIMIA1  
NCIMB11163  
CP1  
B1960  
ATCC31822  
CP4  
B12526  
CP3

*R. sp4P02\_1*/Chain 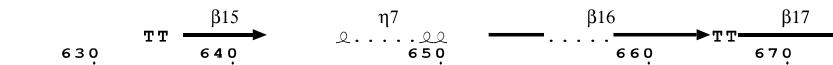

*R. sp4P02\_1*/Chain  
francensis  
ATTC10988  
CU1  
CU1rif2  
uvs51  
B23394  
Z6  
B4492  
PROIMIA1  
NCIMB11163  
CP1  
B1960  
ATCC31822  
CP4  
B12526  
CP3
