# Supplementary material for: Zymomonas diversity and potential for biofuel production
Source: PubMed Central journal article supplement (PMC8088579; doi:10.1186/s13068-021-01958-2), 2021-05-01
Supplement: 13068_2021_1958_MOESM3_ESM.pdf [file 13068_2021_1958_MOESM3_ESM.pdf]

|           | 1     | 10                                         | 20            | 30 | 40 | 50 | 60 |
|-----------|-------|--------------------------------------------|---------------|----|----|----|----|
| ZM4       | MKRIK | GITLASSLAGAMMLGSLAVDPLPASVSKNPTPDNKTGATQTG | TTAGSGSAIQLLR |    |    |    |    |
| B23394    | MKRIK | GITLASSLAGAMMLGSLAVDPLPASVSKNPTPDNKTGATQTG | TTAGSGSAIQLLR |    |    |    |    |
| Z6        | MKRIK | GITLASSLAGAMMLGSLAVDPLPASVSKNPTPDNKTGATQTG | TTAGSGSAIQLLR |    |    |    |    |
| B4492     | MKRIK | GITLASSLAGAMMLGSLAVDPLPASVSKNPTPDNKTGATQTG | TTAGSGSAIQLLR |    |    |    |    |
| ATCC10988 | MKRIK | GITLASSLAGAMMLGSLAVDPLPASVSKNPTPDNKTGATQTG | TTAGSGSAIQLLR |    |    |    |    |
| CU1       | MKRIK | GITLASSLAGAMMLGSLAVDPLPASVSKNPTPDNKTGATQTG | TTAGSGSAIQLLR |    |    |    |    |
| CU1rif2   | MKRIK | GITLASSLAGAMMLGSLAVDPLPASVSKNPTPDNKTGATQTG | TTAGSGSAIQLLR |    |    |    |    |
| uvs51     | MKRIK | GITLASSLAGAMMLGSLAVDPLPASVSKNPTPDNKTGATQTG | TTAGSGSAIQLLR |    |    |    |    |
| NCIMB1163 | MKRIK | GITLASSLAGAMMLGSLAVDPLPASVSKNPTPDNKTGATQTG | TTAGSGSAIQLLR |    |    |    |    |
| PROIMIA1  | MKRIK | GITLASSLAGAMMLGSLAVDPLPASVSKNPTPDNKTGATQTG | TTAGSGSAIQLLR |    |    |    |    |
| CP3       | MKRIK | GITLASSLAGAMMLGSLAVDPLPASVSKNPTPDNKTGATQTG | TTAGSGSAIQLLR |    |    |    |    |
| B12526    | MKRIK | GITLASSLAGAMMLGSLAVDPLPASVSKNPTPDNKTGATQTG | TTAGSGSAIQLLR |    |    |    |    |
| CP4       | MKRIK | GITLASSLAGAMMLGSLAVDPLPASVSKNPTPDNKTGATQTG | TTAGSGSAIQLLR |    |    |    |    |
| CP1       | MKRIK | GITLASSLAGAMMLGSLAVDPLPASVSKNPTPDNKTGATQTG | TTAGSGSAIQLLR |    |    |    |    |
| B1960     | MKRIK | GITLASSLAGAMMLGSLAVDPLPASVSKNPTPDNKTGATQTG | TTAGSGSAIQLLR |    |    |    |    |
| ATCC31822 | MKRIK | GITLASSLAGAMMLGSLAVDPLPASVSKNPTPDNKTGATQTG | TTAGSGSAIQLLR |    |    |    |    |

|           | 70   | 80                                             | 90          | 100 | 110 | 120 |
|-----------|------|------------------------------------------------|-------------|-----|-----|-----|
| ZM4       | HQAI | FWKNRGRNDLAANAWORLLEIDPNNKMAKQALQESTFVPAAPESDS | SSPNNAPTKIV |     |     |     |
| B23394    | HQAI | FWKNRGRNDLAANAWORLLEIDPNNKMAKQALQESTFVPAAPESDS | SSPNNAPTKIV |     |     |     |
| Z6        | HQAI | FWKNRGRNDLAANAWORLLEIDPNNKMAKQALQESTFVPAAPESDS | SSPNNAPTKIV |     |     |     |
| B4492     | HQAI | FWKNRGRNDLAANAWORLLEIDPNNKMAKQALQESTFVPAAPESDS | SSPNNAPTKIV |     |     |     |
| ATCC10988 | HQAI | FWKNRGRNDLAANAWORLLEIDPNNKMAKQALQESTFVPAAPESDS | SSPNNAPTKIV |     |     |     |
| CU1       | HQAI | FWKNRGRNDLAANAWORLLEIDPNNKMAKQALQESTFVPAAPESDS | SSPNNAPTKIV |     |     |     |
| CU1rif2   | HQAI | FWKNRGRNDLAANAWORLLEIDPNNKMAKQALQESTFVPAAPESDS | SSPNNAPTKIV |     |     |     |
| uvs51     | HQAI | FWKNRGRNDLAANAWORLLEIDPNNKMAKQALQESTFVPAAPESDS | SSPNNAPTKIV |     |     |     |
| NCIMB1163 | HQAI | FWKNRGRNDLAANAWORLLEIDPNNKMAKQALQESTFVPAAPESDS | SSPNNAPTKIV |     |     |     |
| PROIMIA1  | HQAI | FWKNRGRNDLAANAWORLLEIDPNNKMAKQALQESTFVPAAPESDS | SSPNNAPTKIV |     |     |     |
| CP3       | HQAI | FWKNRGRNDLAANAWORLLEIDPNNKMAKQALQESTFVPAAPESDS | SSPNNAPTKIV |     |     |     |
| B12526    | HQAI | FWKNRGRNDLAANAWORLLEIDPNNKMAKQALQESTFVPAAPESDS | SSPNNAPTKIV |     |     |     |
| CP4       | HQAI | FWKNRGRNDLAANAWORLLEIDPNNKMAKQALQESTFVPAAPESDS | SSPNNAPTKIV |     |     |     |
| CP1       | HQAI | FWKNRGRNDLAANAWORLLEIDPNNKMAKQALQESTFVPAAPESDS | SSPNNAPTKIV |     |     |     |
| B1960     | HQAI | FWKNRGRNDLAANAWORLLEIDPNNKMAKQALQESTFVPAAPESDS | SSPNNAPTKIV |     |     |     |
| ATCC31822 | HQAI | FWKNRGRNDLAANAWORLLEIDPNNKMAKQALQESTFVPAAPESDS | SSPNNAPTKIV |     |     |     |

|           | 130                  | 140                       | 150 | 160            | 170 | 180 |
|-----------|----------------------|---------------------------|-----|----------------|-----|-----|
| ZM4       | TGQGGRSFPTGLTPSARAGR | IRLEGFNAFKNNOLDIAEQRFRRAL | E   | LYAHDKDALGGLGI |     |     |
| B23394    | TGQGGRSFPTGLTPSARAGR | IRLEGFNAFKNNOLDIAEQRFRRAL | E   | LYAHDKDALGGLGI |     |     |
| Z6        | TGQGGRSFPTGLTPSARAGR | IRLEGFNAFKNNOLDIAEQRFRRAL | E   | LYAHDKDALGGLGI |     |     |
| B4492     | TGQGGRSFPTGLTPSARAGR | IRLEGFNAFKNNOLDIAEQRFRRAL | E   | LYAHDKDALGGLGI |     |     |
| ATCC10988 | TGQGGRSFPTGLTPSARAGR | IRLEGFNAFKNNOLDIAEQRFRRAL | E   | LYAHDKDALGGLGI |     |     |
| CU1       | TGQGGRSFPTGLTPSARAGR | IRLEGFNAFKNNOLDIAEQRFRRAL | E   | LYAHDKDALGGLGI |     |     |
| CU1rif2   | TGQGGRSFPTGLTPSARAGR | IRLEGFNAFKNNOLDIAEQRFRRAL | E   | LYAHDKDALGGLGI |     |     |
| uvs51     | TGQGGRSFPTGLTPSARAGR | IRLEGFNAFKNNOLDIAEQRFRRAL | E   | LYAHDKDALGGLGI |     |     |
| NCIMB1163 | TGQGGRSFPTGLTPSARAGR | IRLEGFNAFKNNOLDIAEQRFRRAL | E   | LYAHDKDALGGLGI |     |     |
| PROIMIA1  | TGQGGRSFPTGLTPSARAGR | IRLEGFNAFKNNOLDIAEQRFRRAL | E   | LYAHDKDALGGLGI |     |     |
| CP3       | TGQGGRSFPTGLTPSARAGR | IRLEGFNAFKNNOLDIAEQRFRRAL | E   | LYAHDKDALGGLGI |     |     |
| B12526    | TGQGGRSFPTGLTPSARAGR | IRLEGFNAFKNNOLDIAEQRFRRAL | E   | LYAHDKDALGGLGI |     |     |
| CP4       | TGQGGRSFPTGLTPSARAGR | IRLEGFNAFKNNOLDIAEQRFRRAL | E   | LYAHDKDALGGLGI |     |     |
| CP1       | TGQGGRSFPTGLTPSARAGR | IRLEGFNAFKNNOLDIAEQRFRRAL | E   | LYAHDKDALGGLGI |     |     |
| B1960     | TGQGGRSFPTGLTPSARAGR | IRLEGFNAFKNNOLDIAEQRFRRAL | E   | LYAHDKDALGGLGI |     |     |
| ATCC31822 | TGQGGRSFPTGLTPSARAGR | IRLEGFNAFKNNOLDIAEQRFRRAL | E   | LYAHDKDALGGLGI |     |     |

|           | 190     | 200             | 210 | 220                      | 230            | 240 |
|-----------|---------|-----------------|-----|--------------------------|----------------|-----|
| ZM4       | IRLKQHR | YAEAIRYLEEASSDK | D   | CYRWANALSSARFYGRFEEAQAAT | IRANQLDKAQSILE |     |
| B23394    | IRLKQHR | YAEAIRYLEEASSDK | D   | CYRWANALSSARFYGRFEEAQAAT | IRANQLDKAQSILE |     |
| Z6        | IRLKQHR | YAEAIRYLEEASSDK | D   | CYRWANALSSARFYGRFEEAQAAT | IRANQLDKAQSILE |     |
| B4492     | IRLKQHR | YAEAIRYLEEASSDK | D   | CYRWANALSSARFYGRFEEAQAAT | IRANQLDKAQSILE |     |
| ATCC10988 | IRLKQHR | YAEAIRYLEEASSDK | D   | CYRWANALSSARFYGRFEEAQAAT | IRANQLDKAQSILE |     |
| CU1       | IRLKQHR | YAEAIRYLEEASSDK | D   | CYRWANALSSARFYGRFEEAQAAT | IRANQLDKAQSILE |     |
| CU1rif2   | IRLKQHR | YAEAIRYLEEASSDK | D   | CYRWANALSSARFYGRFEEAQAAT | IRANQLDKAQSILE |     |
| uvs51     | IRLKQHR | YAEAIRYLEEASSDK | D   | CYRWANALSSARFYGRFEEAQAAT | IRANQLDKAQSILE |     |
| NCIMB1163 | IRLKQHR | YAEAIRYLEEASSDK | D   | CYRWANALSSARFYGRFEEAQAAT | IRANQLDKAQSILE |     |
| PROIMIA1  | IRLKQHR | YAEAIRYLEEASSDK | D   | CYRWANALSSARFYGRFEEAQAAT | IRANQLDKAQSILE |     |
| CP3       | IRLKQHR | YAEAIRYLEEASSDK | D   | CYRWANALSSARFYGRFEEAQAAT | IRANQLDKAQSILE |     |
| B12526    | IRLKQHR | YAEAIRYLEEASSDK | D   | CYRWANALSSARFYGRFEEAQAAT | IRANQLDKAQSILE |     |
| CP4       | IRLKQHR | YAEAIRYLEEASSDK | D   | CYRWANALSSARFYGRFEEAQAAT | IRANQLDKAQSILE |     |
| CP1       | IRLKQHR | YAEAIRYLEEASSDK | D   | CYRWANALSSARFYGRFEEAQAAT | IRANQLDKAQSILE |     |
| B1960     | IRLKQHR | YAEAIRYLEEASSDK | D   | CYRWANALSSARFYGRFEEAQAAT | IRANQLDKAQSILE |     |
| ATCC31822 | IRLKQHR | YAEAIRYLEEASSDK | D   | CYRWANALSSARFYGRFEEAQAAT | IRANQLDKAQSILE |     |

250 260 270 280 290 300  
ZM4 QLQNQQGGDANVSNALLADIYARQGQFDKAMALYDKLGN SADAVTVARLRSQENSIKARR  
B23394 QLQNQQGGDANVSNALLADIYARQGQFDKAMALYDKLGN SADAVTVARLRSQENSIKARR  
Z6 QLQNQQGGDANVSNALLADIYARQGQFDKAMALYDKLGN SADAVTVARLRSQENSIKARR  
B4492 QLQNQQGGDANVSNALLADIYARQGQFDKAMALYDKLGN SADAVTVARLRSQENSIKARR  
ATCC10988 QLQNQQGGDANVSNALLADIYARQGQFDKAMALYDKLGN SADAVTVARLRSQENSIKARR  
CU1 QLQNQQGGDANVSNALLADIYARQGQFDKAMALYDKLGN SADAVTVARLRSQENSIKARR  
CU1rif2 QLQNQQGGDANVSNALLADIYARQGQFDKAMALYDKLGN SADAVTVARLRSQENSIKARR  
uvs51 QLQNQQGGDANVSNALLADIYARQGQFDKAMALYDKLGN SADAVTVARLRSQENSIKARR  
NCIMB11163 QLQNQQGGDANVSNALLADIYARQGQFDKAMALYDKLGN SADAVTVARLRSQENSIKARR  
PROIMIA1 QLQNQQGGDANVSNALLADIYARQGQFDKAMALYDKLGN SADAVTVARLRSQENSIKARR  
CP3 QLQNQQGGDANVSNALLADIYARQGQFDKAMALYDKLGN SADAVTVARLRSQENSIKARR  
B12526 QLQNQQGGDANVSNALLADIYARQGQFDKAMALYDKLGN SADAVTVARLRSQENSIKARR  
CP4 QLQNQQGGDANVSNALLADIYARQGQFDKAMALYDKLGN SADAVTVARLRSQENSIKARR  
CP1 QLQNQQGGDANVSNALLADIYARQGQFDKAMALYDKLGN SADAVTVARLRSQENSIKARR  
B1960 QLQNQQGGDANVSNALLADIYARQGQFDKAMALYDKLGN SADAVTVARLRSQENSIKARR  
ATCC31822 QLQNQQGGDANVSNALLADIYARQGQFDKAMALYDKLGN SADAVTVARLRSQENSIKARR

310 320 330 340 350 360  
ZM4 ALSQGDYAHAEQYFRTAIANDIANPWLRLDYARLLLKEGHRPEAVSLIRPLEDQASSEEA  
B23394 ALSQGDYAHAEQYFRTAIANDIANPWLRLDYARLLLKEGHRPEAVSLIRPLEDQASSEEA  
Z6 ALSQGDYAHAEQYFRTAIANDIANPWLRLDYARLLLKEGHRPEAVSLIRPLEDQASSEEA  
B4492 ALSQGDYAHAEQYFRTAIANDIANPWLRLDYARLLLKEGHRPEAVSLIRPLEDQASSEEA  
ATCC10988 ALSQGDYAHAEQYFRTAIANDIANPWLRLDYARLLLKEGHRPEAVSLIRPLEDQASSEEA  
CU1 ALSQGDYAHAEQYFRTAIANDIANPWLRLDYARLLLKEGHRPEAVSLIRPLEDQASSEEA  
CU1rif2 ALSQGDYAHAEQYFRTAIANDIANPWLRLDYARLLLKEGHRPEAVSLIRPLEDQASSEEA  
uvs51 ALSQGDYAHAEQYFRTAIANDIANPWLRLDYARLLLKEGHRPEAVSLIRPLEDQASSEEA  
NCIMB11163 ALSQGDYAHAEQYFRTAIANDIANPWLRLDYARLLLKEGHRPEAVSLIRPLEDQASSEEA  
PROIMIA1 ALSQGDYAHAEQYFRTAIANDIANPWLRLDYARLLLKEGHRPEAVSLIRPLEDQASSEEA  
CP3 ALSQGDYAHAEQYFRTAIANDIANPWLRLDYARLLLKEGHRPEAVSLIRPLEDQASSEEA  
B12526 ALSQGDYAHAEQYFRTAIANDIANPWLRLDYARLLLKEGHRPEAVSLIRPLEDQASSEEA  
CP4 ALSQGDYAHAEQYFRTAIANDIANPWLRLDYARLLLKEGHRPEAVSLIRPLEDQASSEEA  
CP1 ALSQGDYAHAEQYFRTAIANDIANPWLRLDYARLLLKEGHRPEAVSLIRPLEDQASSEEA  
B1960 ALSQGDYAHAEQYFRTAIANDIANPWLRLDYARLLLKEGHRPEAVSLIRPLEDQASSEEA  
ATCC31822 ALSQGDYAHAEQYFRTAIANDIANPWLRLDYARLLLKEGHRPEAVSLIRPLEDQASSEEA

370 380 390 400 410 420  
ZM4 IYAASLFWQEMGDNRRHVISLIERIPDDARTPLINQIAESADINIALARAKRMSLYGRRGD  
B23394 IYAASLFWQEMGDNRRHVISLIERIPDDARTPLINQIAESADINIALARAKRMSLYGRRGD  
Z6 IYAASLFWQEMGDNRRHVISLIERIPDDARTPLINQIAESADINIALARAKRMSLYGRRGD  
B4492 IYAASLFWQEMGDNRRHVISLIERIPDDARTPLINQIAESADINIALARAKRMSLYGRRGD  
ATCC10988 IYAASLFWQEMGDNRRHVISLIERIPDDARTPLINQIAESADINIALARAKRMSLYGRRGD  
CU1 IYAASLFWQEMGDNRRHVISLIERIPDDARTPLINQIAESADINIALARAKRMSLYGRRGD  
CU1rif2 IYAASLFWQEMGDNRRHVISLIERIPDDARTPLINQIAESADINIALARAKRMSLYGRRGD  
uvs51 IYAASLFWQEMGDNRRHVISLIERIPDDARTPLINQIAESADINIALARAKRMSLYGRRGD  
NCIMB11163 IYAASLFWQEMGDNRRHVISLIERIPDDARTPLINQIAESADINIALARAKRMSLYGRRGD  
PROIMIA1 IYAASLFWQEMGDNRRHVISLIERIPDDARTPLINQIAESADINIALARAKRMSLYGRRGD  
CP3 IYAASLFWQEMGDNRRHVISLIERIPDDARTPLINQIAESADINIALARAKRMSLYGRRGD  
B12526 IYAASLFWQEMGDNRRHVISLIERIPDDARTPLINQIAESADINIALARAKRMSLYGRRGD  
CP4 IYAASLFWQEMGDNRRHVISLIERIPDDARTPLINQIAESADINIALARAKRMSLYGRRGD  
CP1 IYAASLFWQEMGDNRRHVISLIERIPDDARTPLINQIAESADINIALARAKRMSLYGRRGD  
B1960 IYAASLFWQEMGDNRRHVISLIERIPDDARTPLINQIAESADINIALARAKRMSLYGRRGD  
ATCC31822 IYAASLFWQEMGDNRRHVISLIERIPDDARTPLINQIAESADINIALARAKRMSLYGRRGD

430 440 450 460 470 480  
ZM4 AIGLLRSLANDPNRSISQLGMIADGLLQLGDVEDAAFLAEHSLSLPLGEANDYQASLSVL  
B23394 AIGLLRSLANDPNRSISQLGMIADGLLQLGDVEDAAFLAEHSLSLPLGEANDYQASLSVL  
Z6 AIGLLRSLANDPNRSISQLGMIADGLLQLGDVEDAAFLAEHSLSLPLGEANDYQASLSVL  
B4492 AIGLLRSLANDPNRSISQLGMIADGLLQLGDVEDAAFLAEHSLSLPLGEANDYQASLSVL  
ATCC10988 AIGLLRSLANDPNRSISQLGMIADGLLQLGDVEDAAFLAEHSLSLPLGEANDYQASLSVL  
CU1 AIGLLRSLANDPNRSISQLGMIADGLLQLGDVEDAAFLAEHSLSLPLGEANDYQASLSVL  
CU1rif2 AIGLLRSLANDPNRSISQLGMIADGLLQLGDVEDAAFLAEHSLSLPLGEANDYQASLSVL  
uvs51 AIGLLRSLANDPNRSISQLGMIADGLLQLGDVEDAAFLAEHSLSLPLGEANDYQASLSVL  
NCIMB11163 AIGLLRSLANDPNRSISQLGMIADGLLQLGDVEDAAFLAEHSLSLPLGEANDYQASLSVL  
PROIMIA1 AIGLLRSLANDPNRSISQLGMIADGLLQLGDVEDAAFLAEHSLSLPLGEANDYQASLSVL  
CP3 AIGLLRSLANDPNRSISQLGMIADGLLQLGDVEDAAFLAEHSLSLPLGEANDYQASLSVL  
B12526 AIGLLRSLANDPNRSISQLGMIADGLLQLGDVEDAAFLAEHSLSLPLGEANDYQASLSVL  
CP4 AIGLLRSLANDPNRSISQLGMIADGLLQLGDVEDAAFLAEHSLSLPLGEANDYQASLSVL  
CP1 AIGLLRSLANDPNRSISQLGMIADGLLQLGDVEDAAFLAEHSLSLPLGEANDYQASLSVL  
B1960 AIGLLRSLANDPNRSISQLGMIADGLLQLGDVEDAAFLAEHSLSLPLGEANDYQASLSVL  
ATCC31822 AIGLLRSLANDPNRSISQLGMIADGLLQLGDVEDAAFLAEHSLSLPLGEANDYQASLSVL

|            | 490             | 500                    | 510                     | 520 | 530 | 540 |
|------------|-----------------|------------------------|-------------------------|-----|-----|-----|
| ZM4        | IRTGHYDTASDFISQ | IASEMSRHDQNGYKMLNRTLAI | ARADMMRQKKLYMPAFDVLHQAW |     |     |     |
| B23394     | IRTGHYDTASDFISQ | IASEMSRHDQNGYKMLNRTLAI | ARADMMRQKKLYMPAFDVLHQAW |     |     |     |
| Z6         | IRTGHYDTASDFISQ | IASEMSRHDQNGYKMLNRTLAI | ARADMMRQKKLYMPAFDVLHQAW |     |     |     |
| B4492      | IRTGHYDTASDFISQ | IASEMSRHDQNGYKMLNRTLAI | ARADMMRQKKLYMPAFDVLHQAW |     |     |     |
| ATCC10988  | IRTGHYDTASDFISQ | IASEMSRHDQNGYKMLNRTLAI | ARADMMRQKKLYMPAFDVLHQAW |     |     |     |
| CU1        | IRTGHYDTASDFISQ | IASEMSRHDQNGYKMLNRTLAI | ARADMMRQKKLYMPAFDVLHQAW |     |     |     |
| CUIrif2    | IRTGHYDTASDFISQ | IASEMSRHDQNGYKMLNRTLAI | ARADMMRQKKLYMPAFDVLHQAW |     |     |     |
| uvs51      | IRTGHYDTASDFISQ | IASEMSRHDQNGYKMLNRTLAI | ARADMMRQKKLYMPAFDVLHQAW |     |     |     |
| NCIMB11163 | IRTGHYDTASDFISQ | IASEMSRHDQNGYKMLNRTLAI | ARADMMRQKKLYMPAFDVLHQAW |     |     |     |
| PROIMIA1   | IRTGHYDTASDFISQ | IASEMSRHDQNGYKMLNRTLAI | ARADMMRQKKLYMPAFDVLHQAW |     |     |     |
| CP3        | IRTGHYDTASDFISQ | IASEMSRHDQNGYKMLNRTLAI | ARADMMRQKKLYMPAFDVLHQAW |     |     |     |
| B12526     | IRTGHYDTASDFISQ | IASEMSRHDQNGYKMLNRTLAI | ARADMMRQKKLYMPAFDVLHQAW |     |     |     |
| CP4        | IRTGHYDTASDFISQ | IASEMSRHDQNGYKMLNRTLAI | ARADMMRQKKLYMPAFDVLHQAW |     |     |     |
| CP1        | IRTGHYDTASDFISQ | IASEMSRHDQNGYKMLNRTLAI | ARADMMRQKKLYMPAFDVLHQAW |     |     |     |
| B1960      | IRTGHYDTASDFISQ | IASEMSRHDQNGYKMLNRTLAI | ARADMMRQKKLYMPAFDVLHQAW |     |     |     |
| ATCC31822  | IRTGHYDTASDFISQ | IASEMSRHDQNGYKMLNRTLAI | ARADMMRQKKLYMPAFDVLHQAW |     |     |     |

|            | 550             | 560                                           | 570 | 580 | 590 | 600 |
|------------|-----------------|-----------------------------------------------|-----|-----|-----|-----|
| ZM4        | EETGGGDNILPVLAR | IYQDAGLTDKAQSLYHYMLRNHPRDASALLNSLTIAQQQGNDDRA |     |     |     |     |
| B23394     | EETGGGDNILPVLAR | IYQDAGLTDKAQSLYHYMLRNHPRDASALLNSLTIAQQQGNDDRA |     |     |     |     |
| Z6         | EETGGGDNILPVLAR | IYQDAGLTDKAQSLYHYMLRNHPRDASALLNSLTIAQQQGNDDRA |     |     |     |     |
| B4492      | EETGGGDNILPVLAR | IYQDAGLTDKAQSLYHYMLRNHPRDASALLNSLTIAQQQGNDDRA |     |     |     |     |
| ATCC10988  | EETGGGDNILPVLAR | IYQDAGLTDKAQSLYHYMLRNHPRDASALLNSLTIAQQQGNDDRA |     |     |     |     |
| CU1        | EETGGGDNILPVLAR | IYQDAGLTDKAQSLYHYMLRNHPRDASALLNSLTIAQQQGNDDRA |     |     |     |     |
| CUIrif2    | EETGGGDNILPVLAR | IYQDAGLTDKAQSLYHYMLRNHPRDASALLNSLTIAQQQGNDDRA |     |     |     |     |
| uvs51      | EETGGGDNILPVLAR | IYQDAGLTDKAQSLYHYMLRNHPRDASALLNSLTIAQQQGNDDRA |     |     |     |     |
| NCIMB11163 | EETGGGDNILPVLAR | IYQDAGLTDKAQSLYHYMLRNHPRDASALLNSLTIAQQQGNDDRA |     |     |     |     |
| PROIMIA1   | EETGGGDNILPVLAR | IYQDAGLTDKAQSLYHYMLRNHPRDASALLNSLTIAQQQGNDDRA |     |     |     |     |
| CP3        | EETGGGDNILPVLAR | IYQDAGLTDKAQSLYHYMLRNHPRDASALLNSLTIAQQQGNDDRA |     |     |     |     |
| B12526     | EETGGGDNILPVLAR | IYQDAGLTDKAQSLYHYMLRNHPRDASALLNSLTIAQQQGNDDRA |     |     |     |     |
| CP4        | EETGGGDNILPVLAR | IYQDAGLTDKAQSLYHYMLRNHPRDASALLNSLTIAQQQGNDDRA |     |     |     |     |
| CP1        | EETGGGDNILPVLAR | IYQDAGLTDKAQSLYHYMLRNHPRDASALLNSLTIAQQQGNDDRA |     |     |     |     |
| B1960      | EETGGGDNILPVLAR | IYQDAGLTDKAQSLYHYMLRNHPRDASALLNSLTIAQQQGNDDRA |     |     |     |     |
| ATCC31822  | EETGGGDNILPVLAR | IYQDAGLTDKAQSLYHYMLRNHPRDASALLNSLTIAQQQGNDDRA |     |     |     |     |

|            | 610             | 620                 | 630                         | 640 | 650 | 660 |
|------------|-----------------|---------------------|-----------------------------|-----|-----|-----|
| ZM4        | EQALRRLKKVAPSNP | VYVYLASARFEKSKSDDEK | ALKDLKKAHRVYQRMVROGRSADLPSP |     |     |     |
| B23394     | EQALRRLKKVAPSNP | VYVYLASARFEKSKSDDEK | ALKDLKKAHRVYQRMVROGRSADLPSP |     |     |     |
| Z6         | EQALRRLKKVAPSNP | VYVYLASARFEKSKSDDEK | ALKDLKKAHRVYQRMVROGRSADLPSP |     |     |     |
| B4492      | EQALRRLKKVAPSNP | VYVYLASARFEKSKSDDEK | ALKDLKKAHRVYQRMVROGRSADLPSP |     |     |     |
| ATCC10988  | EQALRRLKKVAPSNP | VYVYLASARFEKSKSDDEK | ALKDLKKAHRVYQRMVROGRSADLPSP |     |     |     |
| CU1        | EQALRRLKKVAPSNP | VYVYLASARFEKSKSDDEK | ALKDLKKAHRVYQRMVROGRSADLPSP |     |     |     |
| CUIrif2    | EQALRRLKKVAPSNP | VYVYLASARFEKSKSDDEK | ALKDLKKAHRVYQRMVROGRSADLPSP |     |     |     |
| uvs51      | EQALRRLKKVAPSNP | VYVYLASARFEKSKSDDEK | ALKDLKKAHRVYQRMVROGRSADLPSP |     |     |     |
| NCIMB11163 | EQALRRLKKVAPSNP | VYVYLASARFEKSKSDDEK | ALKDLKKAHRVYQRMVROGRSADLPSP |     |     |     |
| PROIMIA1   | EQALRRLKKVAPSNP | VYVYLASARFEKSKSDDEK | ALKDLKKAHRVYQRMVROGRSADLPSP |     |     |     |
| CP3        | EQALRRLKKVAPSNP | VYVYLASARFEKSKSDDEK | ALKDLKKAHRVYQRMVROGRSADLPSP |     |     |     |
| B12526     | EQALRRLKKVAPSNP | VYVYLASARFEKSKSDDEK | ALKDLKKAHRVYQRMVROGRSADLPSP |     |     |     |
| CP4        | EQALRRLKKVAPSNP | VYVYLASARFEKSKSDDEK | ALKDLKKAHRVYQRMVROGRSADLPSP |     |     |     |
| CP1        | EQALRRLKKVAPSNP | VYVYLASARFEKSKSDDEK | ALKDLKKAHRVYQRMVROGRSADLPSP |     |     |     |
| B1960      | EQALRRLKKVAPSNP | VYVYLASARFEKSKSDDEK | ALKDLKKAHRVYQRMVROGRSADLPSP |     |     |     |
| ATCC31822  | EQALRRLKKVAPSNP | VYVYLASARFEKSKSDDEK | ALKDLKKAHRVYQRMVROGRSADLPSP |     |     |     |

|            | 670               | 680                                | 690        | 700 | 710 | 720 |
|------------|-------------------|------------------------------------|------------|-----|-----|-----|
| ZM4        | AANDDNSPIVVDAPNLE | IRDNYHPPFALNEEDFRLQTRSQVEMASSDSDAD | MDRDDYHYNR |     |     |     |
| B23394     | AANDDNSPIVVDAPNLE | IRDNYHPPFALNEEDFRLQTRSQVEMASSDSDAD | MDRDDYHYNR |     |     |     |
| Z6         | AANDDNSPIVVDAPNLE | IRDNYHPPFALNEEDFRLQTRSQVEMASSDSDAD | MDRDDYHYNR |     |     |     |
| B4492      | AANDDNSPIVVDAPNLE | IRDNYHPPFALNEEDFRLQTRSQVEMASSDSDAD | MDRDDYHYNR |     |     |     |
| ATCC10988  | AANDDNSPIVVDAPNLE | IRDNYHPPFALNEEDFRLQTRSQVEMASSDSDAD | MDRDDYHYNR |     |     |     |
| CU1        | AANDDNSPIVVDAPNLE | IRDNYHPPFALNEEDFRLQTRSQVEMASSDSDAD | MDRDDYHYNR |     |     |     |
| CUIrif2    | AANDDNSPIVVDAPNLE | IRDNYHPPFALNEEDFRLQTRSQVEMASSDSDAD | MDRDDYHYNR |     |     |     |
| uvs51      | AANDDNSPIVVDAPNLE | IRDNYHPPFALNEEDFRLQTRSQVEMASSDSDAD | MDRDDYHYNR |     |     |     |
| NCIMB11163 | AANDDNSPIVVDAPNLE | IRDNYHPPFALNEEDFRLQTRSQVEMASSDSDAD | MDRDDYHYNR |     |     |     |
| PROIMIA1   | AANDDNSPIVVDAPNLE | IRDNYHPPFALNEEDFRLQTRSQVEMASSDSDAD | MDRDDYHYNR |     |     |     |
| CP3        | AANDDNSPIVVDAPNLE | IRDNYHPPFALNEEDFRLQTRSQVEMASSDSDAD | MDRDDYHYNR |     |     |     |
| B12526     | AANDDNSPIVVDAPNLE | IRDNYHPPFALNEEDFRLQTRSQVEMASSDSDAD | MDRDDYHYNR |     |     |     |
| CP4        | AANDDNSPIVVDAPNLE | IRDNYHPPFALNEEDFRLQTRSQVEMASSDSDAD | MDRDDYHYNR |     |     |     |
| CP1        | AANDDNSPIVVDAPNLE | IRDNYHPPFALNEEDFRLQTRSQVEMASSDSDAD | MDRDDYHYNR |     |     |     |
| B1960      | AANDDNSPIVVDAPNLE | IRDNYHPPFALNEEDFRLQTRSQVEMASSDSDAD | MDRDDYHYNR |     |     |     |
| ATCC31822  | AANDDNSPIVVDAPNLE | IRDNYHPPFALNEEDFRLQTRSQVEMASSDSDAD | MDRDDYHYNR |     |     |     |

|            | 730                                | 740  | 750       | 760    | 770       | 780 |
|------------|------------------------------------|------|-----------|--------|-----------|-----|
| ZM4        | DDYDDGFGQTSSYHSARSSGGNDRFANGTSYOKS | QOSE | VKQPSGFS  | SSHPLF | FASSDEENF |     |
| B23394     | DDYDDGFGQTSSYHSARSSGGNDRFANGTSYOKS | QOSE | VKQPSGFS  | SSHPLF | FASSDEENF |     |
| Z6         | DDYDDGFGQTSSYHSARSSGGNDRFANGTSYOKS | QOSE | VKQPSGFS  | SSHPLF | FASSDEENF |     |
| B4492      | DDYDDGFGQTSSYHSARSSGGNDRFANGTSYOKS | QOSE | VKQPSGFS  | SSHPLF | FASSDEENF |     |
| ATCC10988  | DDYDDGFGQTSSYHSARSSGGNDRFANGTSYOKP | QOP  | AVKQPSGFS | SSHPLF | FASSDEENF |     |
| CU1        | DDYDDGFGQTSSYHSARSSGGNDRFANGTSYOKP | QOP  | AVKQPSGFS | SSHPLF | FASSDEENF |     |
| CUIrif2    | DDYDDGFGQTSSYHSARSSGGNDRFANGTSYOKP | QOP  | AVKQPSGFS | SSHPLF | FASSDEENF |     |
| uvs51      | DDYDDGFGQTSSYHSARSSGGNDRFANGTSYOKP | QOP  | AVKQPSGFS | SSHPLF | FASSDEENF |     |
| NCIMB11163 | DDYDDGFGQTSSYHSARSSGGNDRFANGTSYOKP | QOS  | AVKQPSGFS | SSHPLF | FASSDEENF |     |
| PROIMIA1   | DDYDDGFGQTSSYHSARSSGGNDRFANGTSYOKP | QOS  | AVKQPSGFS | SSHPLF | FASSDEENF |     |
| CP3        | DDYDDGFGQTSSYHSARSSGGNDRFANGTSYOKP | QOS  | AVKQPSGFS | SSHPLF | FASSDEENF |     |
| B12526     | DDYDDGFGQTSSYHSARSSGGNDRFANGTSYOKP | QOS  | AVKQPSGFS | SSHPLF | FASSDEENF |     |
| CP4        | DDYDDGFGQTSSYHSARSSGGNDRFANGTSYOKP | QOS  | AVKQPSGFS | SSHPLF | FASSDEENF |     |
| CP1        | DDYDDGFGQTSSYHSARSSGGNDRFANGTSYOKP | QOP  | AVKQPSGFS | SSHPLF | FASSDEENF |     |
| B1960      | DDYDDGFGQTSSYHSARSSGGNDRFANGTSYOKP | QOP  | AVKQPSGFS | SSHPLF | FASSDEENF |     |
| ATCC31822  | DDYDDGFGQTSSYHSARSSGGNDRFANGTSYOKP | QOP  | AVKQPSGFS | SSHPLF | FASSDEENF |     |

|            | 790              | 800       | 810             | 820                 | 830                 |
|------------|------------------|-----------|-----------------|---------------------|---------------------|
| ZM4        | HNRSEEEKPASHHSYS | SRQALA    | ADT             | TDYNEGRKAAHTVSS     | ..SSRKTQTSQPLLANNFT |
| B23394     | HNRSEEEKPASHHSYS | SRQALA    | ADT             | TDYNEGRKAAHTVSS     | ..SSRKTQTSQPLLANNFT |
| Z6         | HNRSEEEKPASHHSYS | SRQALA    | ADT             | TDYNEGRKAAHTVSS     | ..SSRKTQTSQPLLANNFT |
| B4492      | HNRSEEEKPASHHSYS | SRQALA    | ADT             | TDYNEGRKAAHTVSS     | ..SSRKTQTSQPLLANNFT |
| ATCC10988  | HNRSEEEKASRHSYS  | SRQGLAADN | TDYNEGRKAAHTVSS | ..SSRKTQTSQPLLANNFT |                     |
| CU1        | HNRSEEEKASRHSYS  | SRQGLAADN | TDYNEGRKAAHTVSS | ..SSRKTQTSQPLLANNFT |                     |
| CUIrif2    | HNRSEEEKASRHSYS  | SRQGLAADN | TDYNEGRKAAHTVSS | ..SSRKTQTSQPLLANNFT |                     |
| uvs51      | HNRSEEEKASRHSYS  | SRQGLAADN | TDYNEGRKAAHTVSS | ..SSRKTQTSQPLLANNFT |                     |
| NCIMB11163 | HNRSEEEKASRHSYS  | SRQGLAADN | TDYNEGRKAAHTVSS | ..SSRKTQTSQPLLANNFT |                     |
| PROIMIA1   | HNRSEEEKASRHSYS  | SRQGLAADN | TDYNEGRKAAHTVSS | ..SSRKTQTSQPLLANNFT |                     |
| CP3        | HNRSEEEKASRHSYS  | SRQGLAADN | TDYNEGRKAAHTVSS | ..SSRKTQTSQPLLANNFT |                     |
| B12526     | HNRSEEEKASRHSYS  | SRQGLAADN | TDYNEGRKAAHTVSS | ..SSRKTQTSQPLLANNFT |                     |
| CP4        | HNRSEEEKASRHSYS  | SRQGLAADN | TDYNEGRKAAHTVSS | ..SSRKTQTSQPLLANNFT |                     |
| CP1        | HNRSEEEKASRHSYS  | SRQGLAADN | TDYNEGRKAAHTVSS | SSSRKTQTSQPLLANNFT  |                     |
| B1960      | HNRSEEEKASRHSYS  | SRQGLAADN | TDYNEGRKAAHTVSS | SSSRKTQTSQPLLANNFT  |                     |
| ATCC31822  | HNRSEEEKASRHSYS  | SRQGLAADN | TDYNEGRKAAHTVSS | SSSRKTQTSQPLLANNFT  |                     |

|            | 840                      | 850              | 860                  | 870 | 880 | 890 |
|------------|--------------------------|------------------|----------------------|-----|-----|-----|
| ZM4        | STONALPFPNQTGSRSSGNGLDSL | LNTRVFPDRNLSNDYD | DEDERQEKIKRDMAEQRKYD |     |     |     |
| B23394     | STONALPFPNQTGSRSSGNGLDSL | LNTRVFPDRNLSNDYD | DEDERQEKIKRDMAEQRKYD |     |     |     |
| Z6         | STONALPFPNQTGSRSSGNGLDSL | LNTRVFPDRNLSNDYD | DEDERQEKIKRDMAEQRKYD |     |     |     |
| B4492      | STONALPFPNQTGSRSSGNGLDSL | LNTRVFPDRNLSNDYD | DEDERQEKIKRDMAEQRKYD |     |     |     |
| ATCC10988  | STONALPFPNQTGSRSSGNGLDSL | LNTRVFPDRNLSNDYD | DEDERQEKIKRDMAEQRKYD |     |     |     |
| CU1        | STONALPFPNQTGSRSSGNGLDSL | LNTRVFPDRNLSNDYD | DEDERQEKIKRDMAEQRKYD |     |     |     |
| CUIrif2    | STONALPFPNQTGSRSSGNGLDSL | LNTRVFPDRNLSNDYD | DEDERQEKIKRDMAEQRKYD |     |     |     |
| uvs51      | STONALPFPNQTGSRSSGNGLDSL | LNTRVFPDRNLSNDYD | DEDERQEKIKRDMAEQRKYD |     |     |     |
| NCIMB11163 | STONALPFPNQTGSRSSGNGLDSL | LNTRVFPDRNLSNDYD | DEDERQEKIKRDMAEQRKYD |     |     |     |
| PROIMIA1   | STONALPFPNQTGSRSSGNGLDSL | LNTRVFPDRNLSNDYD | DEDERQEKIKRDMAEQRKYD |     |     |     |
| CP3        | STONALPFPNQTGSRSSGNGLDSL | LNTRVFPDRNLSNDYD | DEDERQEKIKRDMAEQRKYD |     |     |     |
| B12526     | STONALPFPNQTGSRSSGNGLDSL | LNTRVFPDRNLSNDYD | DEDERQEKIKRDMAEQRKYD |     |     |     |
| CP4        | STONALPFPNQTGSRSSGNGLDSL | LNTRVFPDRNLSNDYD | DEDERQEKIKRDMAEQRKYD |     |     |     |
| CP1        | STONALPFPNQTGSRSSGNGLDSL | LNTRVFPDRNLSNDYD | DEDERQEKIKRDMAEQRKYD |     |     |     |
| B1960      | STONALPFPNQTGSRSSGNGLDSL | LNTRVFPDRNLSNDYD | DEDERQEKIKRDMAEQRKYD |     |     |     |
| ATCC31822  | STONALPFPNQTGSRSSGNGLDSL | LNTRVFPDRNLSNDYD | DEDERQEKIKRDMAEQRKYD |     |     |     |

|            | 900                     | 910 | 920   | 930              | 940            | 950 |
|------------|-------------------------|-----|-------|------------------|----------------|-----|
| ZM4        | SWNIFAPGSAFGQSTMLEAPSYT | SI  | AVADP | INYPAAARLHGGSHDP | LLRDINDGIDHLSL |     |
| B23394     | SWNIFAPGSAFGQSTMLEAPSYT | SI  | AVADP | INYPAAARLHGGSHDP | LLRDINDGIDHLSL |     |
| Z6         | SWNIFAPGSAFGQSTMLEAPSYT | SI  | AVADP | INYPAAARLHGGSHDP | LLRDINDGIDHLSL |     |
| B4492      | SWNIFAPGSAFGQSTMLEAPSYT | SI  | AVADP | INYPAAARLHGGSHDP | LLRDINDGIDHLSL |     |
| ATCC10988  | SWNIFSPGSAFGQSTMLEAPSYT | SI  | AVADP | INYPAAARLHGGSHDP | LLRDINDGIDHLSL |     |
| CU1        | SWNIFSPGSAFGQSTMLEAPSYT | SI  | AVADP | INYPAAARLHGGSHDP | LLRDINDGIDHLSL |     |
| CUIrif2    | SWNIFSPGSAFGQSTMLEAPSYT | SI  | AVADP | INYPAAARLHGGSHDP | LLRDINDGIDHLSL |     |
| uvs51      | SWNIFSPGSAFGQSTMLEAPSYT | SI  | AVADP | INYPAAARLHGGSHDP | LLRDINDGIDHLSL |     |
| NCIMB11163 | SWNIFAPGSAFGQSTMLEAPSYT | SI  | AVADP | INYPAAARLHGGSHDP | LLRDINDGIDHLSL |     |
| PROIMIA1   | SWNIFAPGSAFGQSTMLEAPSYT | SI  | AVADP | INYPAAARLHGGSHDP | LLRDINDGIDHLSL |     |
| CP3        | SWNIFSPGSAFGQSTMLEAPSYT | SI  | AVADP | INYPAAARLHGGSHDP | LLRDINDGIDHLSL |     |
| B12526     | SWNIFSPGSAFGQSTMLEAPSYT | SI  | AVADP | INYPAAARLHGGSHDP | LLRDINDGIDHLSL |     |
| CP4        | SWNIFSPGSAFGQSTMLEAPSYT | SI  | AVADP | INYPAAARLHGGSHDP | LLRDINDGIDHLSL |     |
| CP1        | SWNIFSPGSAFGQSTMLEAPSYT | SI  | AVADP | INYPAAARLHGGSHDP | LLRDINDGIDHLSL |     |
| B1960      | SWNIFSPGSAFGQSTMLEAPSYT | SI  | AVADP | INYPAAARLHGGSHDP | LLRDINDGIDHLSL |     |
| ATCC31822  | SWNIFSPGSAFGQSTMLEAPSYT | SI  | AVADP | INYPAAARLHGGSHDP | LLRDINDGIDHLSL |     |

960 970 980 990 1000 1010  
ZM4 NTGTVLEGTPEFRQHSQNGLSRLNEYAFNAKVSTNLGSRVRGFFSVTPVYLTAGOPDQY  
B23394 NTGTVLEGTPEFRQHSQNGLSRLNEYAFNAKVSTNLGSRVRGFFSVTPVYLTAGOPDQY  
Z6 NTGTVLEGTPEFRQHSQNGLSRLNEYAFNAKVSTNLGSRVRGFFSVTPVYLTAGOPDQY  
B4492 NTGTVLEGTPEFRQHSQNGLSRLNEYAFNAKVSTNLGSRVRGFFSVTPVYLTAGOPDQY  
ATCC10988 NTGTVLEGTPEFRQHSQNGLSRLNEYAFNAKVSTNLGSRVRGFFSVTPVYLTAGOPDQY  
CU1 NTGTVLEGTPEFRQHSQNGLSRLNEYAFNAKVSTNLGSRVRGFFSVTPVYLTAGOPDQY  
CU1rif2 NTGTVLEGTPEFRQHSQNGLSRLNEYAFNAKVSTNLGSRVRGFFSVTPVYLTAGOPDQY  
uvs51 NTGTVLEGTPEFRQHSQNGLSRLNEYAFNAKVSTNLGSRVRGFFSVTPVYLTAGOPDQY  
NCIMB11163 NTGTVLEGTPEFRQHSQNGLSRLNEYAFNAKVSTNLGSRVRGFFSVTPVYLTAGOPDKY  
PROIMIA1 NTGTVLEGTPEFRQHSQNGLSRLNEYAFNAKVSTNLGSRVRGFFSVTPVYLTAGOPDQY  
CP3 NTGTVLEGTPEFRQHSQNGLSRLNEYAFNAKVSTNLGSRVRGFFSVTPVYLTAGOPDQY  
B12526 NTGTVLEGTPEFRQHSQNGLSRLNEYAFNAKVSTNLGSRVRGFFSVTPVYLTAGOPDQY  
CP4 NTGTVLEGTPEFRQHSQNGLSRLNEYAFNAKVSTNLGSRVRGFFSVTPVYLTAGOPDQY  
CP1 NTGTVLEGTPEFRQHSQNGLSRLNEYAFNAKVSTNLGSRVRGFFSVTPVYLTAGOPDQY  
B1960 NTGTVLEGTPEFRQHSQNGLSRLNEYAFNAKVSTNLGSRVRGFFSVTPVYLTAGOPDQY  
ATCC31822 NTGTVLEGTPEFRQHSQNGLSRLNEYAFNAKVSTNLGSRVRGFFSVTPVYLTAGOPDQY

1020 1030 1040 1050 1060 1070  
ZM4 AAPYFGIINPLKSTSSIASGGTAQYAPVKDQASGVALDAGIKIKDIRLDIGTTPIGFRKKT  
B23394 AAPYFGIINPLKSTSSIASGGTAQYAPVKDQASGVALDAGIKIKDIRLDIGTTPIGFRKKT  
Z6 AAPYFGIINPLKSTSSIASGGTAQYAPVKDQASGVALDAGIKIKDIRLDIGTTPIGFRKKT  
B4492 AAPYFGIINPLKSTSSIASGGTAQYAPVKDQASGVALDAGIKIKDIRLDIGTTPIGFRKKT  
ATCC10988 AAPYFGSINPLVSNASIAAGGKAMYAPVKDQASGVALDAGIKIKDIRLDIGTTPIGFRKKT  
CU1 AAPYFGSINPLVSNASIAAGGKAMYAPVKDQASGVALDAGIKIKDIRLDIGTTPIGFRKKT  
CU1rif2 AAPYFGSINPLVSNASIAAGGKAMYAPVKDQASGVALDAGIKIKDIRLDIGTTPIGFRKKT  
uvs51 AAPYFGSINPLVSNASIAAGGKAMYAPVKDQASGVALDAGIKIKDIRLDIGTTPIGFRKKT  
NCIMB11163 AAPYFGSINPLVSNASIAAGGKAMYAPVKDQASGVALDAGIKIKDIRLDIGTTPIGFRKKT  
PROIMIA1 AAPYFGSINPLVSNASIAAGGKAMYAPVKDQASGVALDAGIKIKDIRLDIGTTPIGFRKKT  
CP3 AAPYFGSINPLVSNASIAAGGKAMYAPVKDQASGVALDAGIKIKDIRLDIGTTPIGFRKKT  
B12526 AAPYFGSINPLVSNASIAAGGKAMYAPVKDQASGVALDAGIKIKDIRLDIGTTPIGFRKKT  
CP4 AAPYFGSINPLVSNASIAAGGKAMYAPVKDQASGVALDAGIKIKDIRLDIGTTPIGFRKKT  
CP1 AAPYFGSINPLVSNASIAAGGKAMYAPVKDQASGVALDAGIKIKDIRLDIGTTPIGFRKKT  
B1960 AAPYFGSINPLVSNASIAAGGKAMYAPVKDQASGVALDAGIKIKDIRLDIGTTPIGFRKKT  
ATCC31822 AAPYFGSINPLVSNASIAAGGKAMYAPVKDQASGVALDAGIKIKDIRLDIGTTPIGFRKKT

1080 1090 1100 1110 1120 1130  
ZM4 NIOGGVSWSPQIIDHLTGHIEMERRPVMDSLIAYAGTVDFVMGLTWGSMVMTGGGGGLSY  
B23394 NIOGGVSWSPQIIDHLTGHIEMERRPVMDSLIAYAGTVDFVMGLTWGSMVMTGGGGGLSY  
Z6 NIOGGVSWSPQIIDHLTGHIEMERRPVMDSLIAYAGTVDFVMGLTWGSMVMTGGGGGLSY  
B4492 NIOGGVSWSPQIIDHLTGHIEMERRPVMDSLIAYAGTVDFVMGLTWGSMVMTGGGGGLSY  
ATCC10988 NIOGGVSWSPQIIDHLTGHIEMERRPVMDSLIAYAGTVDFVMGLTWGSMVMTGGGGGLSY  
CU1 NIOGGVSWSPQIIDHLTGHIEMERRPVMDSLIAYAGTVDFVMGLTWGSMVMTGGGGGLSY  
CU1rif2 NIOGGVSWSPQIIDHLTGHIEMERRPVMDSLIAYAGTVDFVMGLTWGSMVMTGGGGGLSY  
uvs51 NIOGGVSWSPQIIDHLTGHIEMERRPVMDSLIAYAGTVDFVMGLTWGSMVMTGGGGGLSY  
NCIMB11163 NIOGGVSWSPQIIDHLTGHIEMERRPVMDSLIAYAGTVDFVMGLTWGSMVMTGGGGGLSY  
PROIMIA1 NIOGGVSWSPQIIDHLTGHIEMERRPVMDSLIAYAGTVDFVMGLTWGSMVMTGGGGGLSY  
CP3 NIOGGVSWSPQIIDHLTGHIEMERRPVMDSLIAYAGTVDFVMGLTWGSMVMTGGGGGLSY  
B12526 NIOGGVSWSPQIIDHLTGHIEMERRPVMDSLIAYAGTVDFVMGLTWGSMVMTGGGGGLSY  
CP4 NIOGGVSWSPQIIDHLTGHIEMERRPVMDSLIAYAGTVDFVMGLTWGSMVMTGGGGGLSY  
CP1 NIOGGVSWSPQIIDHLTGHIEMERRPVMDSLIAYAGTVDFVMGLTWGSMVMTGGGGGLSY  
B1960 NIOGGVSWSPQIIDHLTGHIEMERRPVMDSLIAYAGTVDFVMGLTWGSMVMTGGGGGLSY  
ATCC31822 NIOGGVSWSPQIIDHLTGHIEMERRPVMDSLIAYAGTVDFVMGLTWGSMVMTGGGGGLSY

1140 1150 1160 1170 1180 1190  
ZM4 DVNGSGLYAQGNRYVNGTRVQKNHAVEANVGGYYSLLNTPTSNFSIGVNVNYQHYLNNO  
B23394 DVNGSGLYAQGNRYVNGTRVQKNHAVEANVGGYYSLLNTPTSNFSIGVNVNYQHYLNNO  
Z6 DVNGSGLYAQGNRYVNGTRVQKNHAVEANVGGYYSLLNTPTSNFSIGVNVNYQHYLNNO  
B4492 DVNGSGLYAQGNRYVNGTRVQKNHAVEANVGGYYSLLNTPTSNFSIGVNVNYQHYLNNO  
ATCC10988 DVNGSGLYAQGNRYVNGTRVQKNHAVEANVGGYYSLLNTPTSNFSIGVNVNYQHYLNNO  
CU1 DVNGSGLYAQGNRYVNGTRVQKNHAVEANVGGYYSLLNTPTSNFSIGVNVNYQHYLNNO  
CU1rif2 DVNGSGLYAQGNRYVNGTRVQKNHAVEANVGGYYSLLNTPTSNFSIGVNVNYQHYLNNO  
uvs51 DVNGSGLYAQGNRYVNGTRVQKNHAVEANVGGYYSLLNTPTSNFSIGVNVNYQHYLNNO  
NCIMB11163 DVNGSGLYAQGNRYVNGTRVQKNHAVEANVGGYYSLLNTPTSNFSIGVNVNYQHYLNNO  
PROIMIA1 DVNGSGLYAQGNRYVNGTRVQKNHAVEANVGGYYSLLNTPTSNFSIGVNVNYQHYLNNO  
CP3 DVNGSGLYAQGNRYVNGTRVQKNHAVEANVGGYYSLLNTPTSNFSIGVNVNYQHYLNNO  
B12526 DVNGSGLYAQGNRYVNGTRVQKNHAVEANVGGYYSLLNTPTSNFSIGVNVNYQHYLNNO  
CP4 DVNGSGLYAQGNRYVNGTRVQKNHAVEANVGGYYSLLNTPTSNFSIGVNVNYQHYLNNO  
CP1 DVNGSGLYAQGNRYVNGTRVQKNHAVEANVGGYYSLLNTPTSNFSIGVNVNYQHYLNNO  
B1960 DVNGSGLYAQGNRYVNGTRVQKNHAVEANVGGYYSLLNTPTSNFSIGVNVNYQHYLNNO  
ATCC31822 DVNGSGLYAQGNRYVNGTRVQKNHAVEANVGGYYSLLNTPTSNFSIGVNVNYQHYLNNO



|            | 1200                                                         | 1210 | 1220 | 1230 | 1240 | 1250 |
|------------|--------------------------------------------------------------|------|------|------|------|------|
| ZM4        | YFFSFAQGGYFSPNHFISVAFPLRYTGTLGRWKLNAELAPGYQNFYERSNYIFANEHDLO |      |      |      |      |      |
| B23394     | YFFSFAQGGYFSPNHFISVAFPLRYTGTLGRWKLNAELAPGYQNFYERSNYIFANEHDLO |      |      |      |      |      |
| Z6         | YFFSFAQGGYFSPNHFISVAFPLRYTGTLGRWKLNAELAPGYQNFYERSNYIFANEHDLO |      |      |      |      |      |
| B4492      | YFFSFAQGGYFSPNHFISVAFPLRYTGTLGRWKLNAELAPGYQNFYERSNYIFANEHDLO |      |      |      |      |      |
| ATCC10988  | YFFSFAQGGYFSPNHFISVAFPLRYTGTLGRWKLNAELAPGYQNFYERSNYIFANEHDLO |      |      |      |      |      |
| CU1        | YFFSFAQGGYFSPNHFISVAFPLRYTGTLGRWKLNAELAPGYQNFYERSNYIFANEHDLO |      |      |      |      |      |
| CU1rif2    | YFFSFAQGGYFSPNHFISVAFPLRYTGTLGRWKLNAELAPGYQNFYERSNYIFANEHDLO |      |      |      |      |      |
| uvs51      | YFFSFAQGGYFSPNHFISVAFPLRYTGTLGRWKLNAELAPGYQNFYERSNYIFANEHDLO |      |      |      |      |      |
| NCIMB11163 | YFFSFAQGGYFSPNHFISVAFPLRYTGTLGRWKLNAELAPGYQNFYERSNYIFANEHDLO |      |      |      |      |      |
| PROIMIA1   | YFFSFAQGGYFSPNHFISVAFPLRYTGTLGRWKLNAELAPGYQNFYERSNYIFANEHDLO |      |      |      |      |      |
| CP3        | YFFSFAQGGYFSPNHFISVAFPLRYTGTLGRWKLNAELAPGYQNFYERSNYIFANEHDLO |      |      |      |      |      |
| B12526     | YFFSFAQGGYFSPNHFISVAFPLRYTGTLGRWKLNAELAPGYQNFYERSNYIFANEHDLO |      |      |      |      |      |
| CP4        | YFFSFAQGGYFSPNHFISVAFPLRYTGTLGRWKLNAELAPGYQNFYERSNYIFANEHDLO |      |      |      |      |      |
| CP1        | YFFSFAQGGYFSPNHFISVAFPLRYTGTLGRWKLNAELAPGYQNFYERSNYIFANEHDLO |      |      |      |      |      |
| B1960      | YFFSFAQGGYFSPNHFISVAFPLRYTGTLGRWKLNAELAPGYQNFYERSNYIFANEHDLO |      |      |      |      |      |
| ATCC31822  | YFFSFAQGGYFSPNHFISVAFPLRYTGTLGRWKLNAELAPGYQNFYERSNYIFANEHDLO |      |      |      |      |      |

|            | 1260                                                          | 1270 | 1280 | 1290 | 1300 | 1310 |
|------------|---------------------------------------------------------------|------|------|------|------|------|
| ZM4        | NQMNKYNLANNSLANKFPPGOHHSAGYEGRLDVSYRLSRSAVLGGETIRATTFGPYSEYRE |      |      |      |      |      |
| B23394     | NQMNKYNLANNSLANKFPPGOHHSAGYEGRLDVSYRLSRSAVLGGETIRATTFGPYSEYRE |      |      |      |      |      |
| Z6         | NQMNKYNLANNSLANKFPPGOHHSAGYEGRLDVSYRLSRSAVLGGETIRATTFGPYSEYRE |      |      |      |      |      |
| B4492      | NQMNKYNLANNSLANKFPPGOHHSAGYEGRLDVSYRLSRSAVLGGETIRATTFGPYSEYRE |      |      |      |      |      |
| ATCC10988  | NQMNKYNLANNSLANKFPPGOHHSAGYEGRLDVSYRLSRSAVLGGETIRATTFGPYSEYRE |      |      |      |      |      |
| CU1        | NQMNKYNLANNSLANKFPPGOHHSAGYEGRLDVSYRLSRSAVLGGETIRATTFGPYSEYRE |      |      |      |      |      |
| CU1rif2    | NQMNKYNLANNSLANKFPPGOHHSAGYEGRLDVSYRLSRSAVLGGETIRATTFGPYSEYRE |      |      |      |      |      |
| uvs51      | NQMNKYNLANNSLANKFPPGOHHSAGYEGRLDVSYRLSRSAVLGGETIRATTFGPYSEYRE |      |      |      |      |      |
| NCIMB11163 | NQMNKYNLANNSLANKFPPGOHHSAGYEGRLDVSYRLSRSAVLGGETIRATTFGPYSEYRE |      |      |      |      |      |
| PROIMIA1   | NQMNKYNLANNSLANKFPPGOHHSAGYEGRLDVSYRLSRSAVLGGETIRATTFGPYSEYRE |      |      |      |      |      |
| CP3        | NQMNKYNLANNSLANKFPPGOHHSAGYEGRLDVSYRLSRSAVLGGETIRATTFGPYSEYRE |      |      |      |      |      |
| B12526     | NQMNKYNLANNSLANKFPPGOHHSAGYEGRLDVSYRLSRSAVLGGETIRATTFGPYSEYRE |      |      |      |      |      |
| CP4        | NQMNKYNLANNSLANKFPPGOHHSAGYEGRLDVSYRLSRSAVLGGETIRATTFGPYSEYRE |      |      |      |      |      |
| CP1        | NQMNKYNLANNSLANKFPPGOHHSAGYEGRLDVSYRLSRSAVLGGETIRATTFGPYSEYRE |      |      |      |      |      |
| B1960      | NQMNKYNLANNSLANKFPPGOHHSAGYEGRLDVSYRLSRSAVLGGETIRATTFGPYSEYRE |      |      |      |      |      |
| ATCC31822  | NQMNKYNLANNSLANKFPPGOHHSAGYEGRLDVSYRLSRSAVLGGETIRATTFGPYSEYRE |      |      |      |      |      |

|            | 1320              | 1330                                              |
|------------|-------------------|---------------------------------------------------|
| ZM4        | LLSIHYAMDADKPKDKH | .....                                             |
| B23394     | LLSIHYAMDADKPKDKH | .....                                             |
| Z6         | LLSIHYAMDADKPKDKH | .....                                             |
| B4492      | LLSIHYAMDADKPKDKH | .....                                             |
| ATCC10988  | LLSIHYAMDADKPKDKH | .....                                             |
| CU1        | LLSIHYAMDADKPKDKH | .....                                             |
| CU1rif2    | LLSIHYAMDADKPKDKH | .....                                             |
| uvs51      | LLSIHYAMDADKPKDKH | .....                                             |
| NCIMB11163 | LLSIHYAMDADKPKDKH | .....FILSTLVSVPLLACRKGKAAEADNWTLFKSRFFKDGRI SDSGN |
| PROIMIA1   | LLSIHYAMDADKPKDKH | .....                                             |
| CP3        | LLSIHYAMDADKPKDKH | .....                                             |
| B12526     | LLSIHYAMDADKPKDKH | .....                                             |
| CP4        | LLSIHYAMDADKPKDKH | .....                                             |
| CP1        | LLSIHYAMDADKPKDKH | .....                                             |
| B1960      | LLSIHYAMDADKPKDKH | .....                                             |
| ATCC31822  | LLSIHYAMDADKPKDKH | .....                                             |

|            |                                                              |
|------------|--------------------------------------------------------------|
| ZM4        | .....                                                        |
| B23394     | .....                                                        |
| Z6         | .....                                                        |
| B4492      | .....                                                        |
| ATCC10988  | .....                                                        |
| CU1        | .....                                                        |
| CU1rif2    | .....                                                        |
| uvs51      | .....                                                        |
| NCIMB11163 | GNISHSEGGYGMIAQEA AHDKATFDALWQWTKTHLMRPDMALFAWRFDPSQSNPVSQDN |
| PROIMIA1   | .....                                                        |
| CP3        | .....                                                        |
| B12526     | .....                                                        |
| CP4        | .....                                                        |
| CP1        | .....                                                        |
| B1960      | .....                                                        |
| ATCC31822  | .....                                                        |

ZM4 .....  
B23394 .....  
Z6 .....  
B4492 .....  
ATCC10988 .....  
CU1 .....  
CU1rif2 .....  
uvs51 .....  
NCIMB11163 NATDGDILIAWALLRAEKRWPKNGYGQDSEAIRKSIGKKLVLSGGGETILLPGLQGFTGT  
PROIMIA1 .....  
CP3 .....  
B12526 .....  
CP4 .....  
CP1 .....  
B1960 .....  
ATCC31822 .....

ZM4 .....  
B23394 .....  
Z6 .....  
B4492 .....  
ATCC10988 .....  
CU1 .....  
CU1rif2 .....  
uvs51 .....  
NCIMB11163 DYVILNFSYYIWPALKAFNEADNGAWHNVIESGKKLLAKAKFGLPQLPTDWWAFKNNGNL  
PROIMIA1 .....  
CP3 .....  
B12526 .....  
CP4 .....  
CP1 .....  
B1960 .....  
ATCC31822 .....

ZM4 .....  
B23394 .....  
Z6 .....  
B4492 .....  
ATCC10988 .....  
CU1 .....  
CU1rif2 .....  
uvs51 .....  
NCIMB11163 EPAADKQPYFGFDAVRIPLYLIWGGEDALAAPFAIYWNSYLSHNQPVPAWVDVNSQAIAP  
PROIMIA1 .....  
CP3 .....  
B12526 .....  
CP4 .....  
CP1 .....  
B1960 .....  
ATCC31822 .....

ZM4 .....  
B23394 .....  
Z6 .....  
B4492 .....  
ATCC10988 .....  
CU1 .....  
CU1rif2 .....  
uvs51 .....  
NCIMB11163 YPLSKGGMAILDLAMNKPITAKIADQDDYYSALLALSEIAAKERPHNR  
PROIMIA1 .....  
CP3 .....  
B12526 .....  
CP4 .....  
CP1 .....  
B1960 .....  
ATCC31822 .....
