# Supplementary material for: Zymomonas diversity and potential for biofuel production
Source: PubMed Central journal article supplement (PMC8088579; doi:10.1186/s13068-021-01958-2), 2021-05-01
Supplement: 13068_2021_1958_MOESM4_ESM.pdf [file 13068_2021_1958_MOESM4_ESM.pdf]

|            | 250 | 260 | 270 | 280 | 290 | 300 |    |    |    |    |    |    |   |   |   |   |   |   |   |   |   |   |   |   |   |   |   |   |   |   |   |   |   |   |   |   |   |   |   |   |   |   |   |   |   |   |   |   |
|------------|-----|-----|-----|-----|-----|-----|----|----|----|----|----|----|---|---|---|---|---|---|---|---|---|---|---|---|---|---|---|---|---|---|---|---|---|---|---|---|---|---|---|---|---|---|---|---|---|---|---|---|
| francensis | VP  | TR  | AF  | LQ  | LT  | VG  | WL | QK | EP | NL | AL | VQ | T | P | H | F | F | Y | S | P | D | P | I | Q | R | N | V | P | G | G | S | E | L | P | G | D | N | E | L | F | Y | G | T | V | Q | R | G | N |
| ATTC10988  | VP  | TR  | AF  | LQ  | LT  | VG  | WL | QK | EP | NL | AL | VQ | T | P | H | F | F | Y | S | P | D | P | I | Q | R | N | V | P | G | G | S | E | L | P | G | D | N | E | L | F | Y | G | T | V | Q | R | G | N |
| CUI        | VP  | TR  | AF  | LQ  | LT  | VG  | WL | QK | EP | NL | AL | VQ | T | P | H | F | F | Y | S | P | D | P | I | Q | R | N | V | P | G | G | S | E | L | P | G | D | N | E | L | F | Y | G | T | V | Q | R | G | N |
| CUIrif2    | VP  | TR  | AF  | LQ  | LT  | VG  | WL | QK | EP | NL | AL | VQ | T | P | H | F | F | Y | S | P | D | P | I | Q | R | N | V | P | G | G | S | E | L | P | G | D | N | E | L | F | Y | G | T | V | Q | R | G | N |
| uvs51      | VP  | TR  | AF  | LQ  | LT  | VG  | WL | QK | EP | NL | AL | VQ | T | P | H | F | F | Y | S | P | D | P | I | Q | R | N | V | P | G | G | S | E | L | P | G | D | N | E | L | F | Y | G | T | V | Q | R | G | N |
| B23394     | VP  | TR  | AF  | LQ  | LT  | VG  | WL | QK | EP | NL | AL | VQ | T | P | H | F | F | Y | S | P | D | P | I | Q | R | N | V | P | G | G | S | E | L | P | G | D | N | E | L | F | Y | G | T | V | Q | R | G | N |
| Z6         | VP  | TR  | AF  | LQ  | LT  | VG  | WL | QK | EP | NL | AL | VQ | T | P | H | F | F | Y | S | P | D | P | I | Q | R | N | V | P | G | G | S | E | L | P | G | D | N | E | L | F | Y | G | T | V | Q | R | G | N |
| B4492      | VP  | TR  | AF  | LQ  | LT  | VG  | WL | QK | EP | NL | AL | VQ | T | P | H | F | F | Y | S | P | D | P | I | Q | R | N | V | P | G | G | S | E | L | P | G | D | N | E | L | F | Y | G | T | V | Q | R | G | N |
| PROIMIA1   | VP  | TR  | AF  | LQ  | LT  | VG  | WL | QK | EP | NL | AL | VQ | T | P | H | F | F | Y | S | P | D | P | I | Q | R | N | V | P | G | G | S | E | L | P | G | D | N | E | L | F | Y | G | T | V | Q | R | G | N |
| NCIMB11163 | VP  | TR  | AF  | LQ  | LT  | VG  | WL | QK | EP | NL | AL | VQ | T | P | H | F | F | Y | S | P | D | P | I | Q | R | N | V | P | G | G | S | E | L | P | G | D | N | E | L | F | Y | G | T | V | Q | R | G | N |
| CP1        | VP  | TR  | AF  | LQ  | LT  | VG  | WL | QK | EP | NL | AL | VQ | T | P | H | F | F | Y | S | P | D | P | I | Q | R | N | V | P | G | G | S | E | L | P | G | D | N | E | L | F | Y | G | T | V | Q | R | G | N |
| B1960      | VP  | TR  | AF  | LQ  | LT  | VG  | WL | QK | EP | NL | AL | VQ | T | P | H | F | F | Y | S | P | D | P | I | Q | R | N | V | P | G | G | S | E | L | P | G | D | N | E | L | F | Y | G | T | V | Q | R | G | N |
| ATCC31822  | VP  | TR  | AF  | LQ  | LT  | VG  | WL | QK | EP | NL | AL | VQ | T | P | H | F | F | Y | S | P | D | P | I | Q | R | N | V | P | G | G | S | E | L | P | G | D | N | E | L | F | Y | G | T | V | Q | R | G | N |
| CP4        | VP  | TR  | AF  | LQ  | LT  | VG  | WL | QK | EP | NL | AL | VQ | T | P | H | F | F | Y | S | P | D | P | I | Q | R | N | V | P | G | G | S | E | L | P | G | D | N | E | L | F | Y | G | T | V | Q | R | G | N |
| B12526     | VP  | TR  | AF  | LQ  | LT  | VG  | WL | QK | EP | NL | AL | VQ | T | P | H | F | F | Y | S | P | D | P | I | Q | R | N | V | P | G | G | S | E | L | P | G | D | N | E | L | F | Y | G | T | V | Q | R | G | N |
| CP3        | VP  | TR  | AF  | LQ  | LT  | VG  | WL | QK | EP | NL | AL | VQ | T | P | H | F | F | Y | S | P | D | P | I | Q | R | N | V | P | G | G | S | E | L | P | G | D | N | E | L | F | Y | G | T | V | Q | R | G | N |

|            | 310 | 320 | 330 | 340 | 350 | 360 |   |   |   |   |   |   |   |   |   |   |   |   |   |   |   |   |   |   |   |   |   |   |   |   |   |   |   |   |   |   |   |   |   |   |   |   |   |   |   |   |   |   |   |   |   |   |   |   |   |   |   |   |   |
|------------|-----|-----|-----|-----|-----|-----|---|---|---|---|---|---|---|---|---|---|---|---|---|---|---|---|---|---|---|---|---|---|---|---|---|---|---|---|---|---|---|---|---|---|---|---|---|---|---|---|---|---|---|---|---|---|---|---|---|---|---|---|---|
| francensis | DL  | W   | D   | A   | T   | F   | F | C | G | S | C | A | I | L | R | R | E | A | L | E | E | N | D | G | F | S | G | E | T | V | T | E | D | A | H | T | A | L | K | L | O | R | R | G | W | D | T | A | Y | I | N | I | R | L | S | A | G | L | A |
| ATTC10988  | DL  | W   | D   | A   | T   | F   | F | C | G | S | C | A | I | L | R | R | E | A | L | E | E | N | D | G | F | S | G | E | T | V | T | E | D | A | H | T | A | L | K | L | O | R | R | G | W | D | T | A | Y | I | N | I | R | L | S | A | G | L | A |
| CUI        | DL  | W   | D   | A   | T   | F   | F | C | G | S | C | A | I | L | R | R | E | A | L | E | E | N | D | G | F | S | G | E | T | V | T | E | D | A | H | T | A | L | K | L | O | R | R | G | W | D | T | A | Y | I | N | I | R | L | S | A | G | L | A |
| CUIrif2    | DL  | W   | D   | A   | T   | F   | F | C | G | S | C | A | I | L | R | R | E | A | L | E | E | N | D | G | F | S | G | E | T | V | T | E | D | A | H | T | A | L | K | L | O | R | R | G | W | D | T | A | Y | I | N | I | R | L | S | A | G | L | A |
| uvs51      | DL  | W   | D   | A   | T   | F   | F | C | G | S | C | A | I | L | R | R | E | A | L | E | E | N | D | G | F | S | G | E | T | V | T | E | D | A | H | T | A | L | K | L | O | R | R | G | W | D | T | A | Y | I | N | I | R | L | S | A | G | L | A |
| B23394     | DL  | W   | D   | A   | T   | F   | F | C | G | S | C | A | I | L | R | R | E | A | L | E | E | N | D | G | F | S | G | E | T | V | T | E | D | A | H | T | A | L | K | L | O | R | R | G | W | D | T | A | Y | I | N | I | R | L | S | A | G | L | A |
| Z6         | DL  | W   | D   | A   | T   | F   | F | C | G | S | C | A | I | L | R | R | E | A | L | E | E | N | D | G | F | S | G | E | T | V | T | E | D | A | H | T | A | L | K | L | O | R | R | G | W | D | T | A | Y | I | N | I | R | L | S | A | G | L | A |
| B4492      | DL  | W   | D   | A   | T   | F   | F | C | G | S | C | A | I | L | R | R | E | A | L | E | E | N | D | G | F | S | G | E | T | V | T | E | D | A | H | T | A | L | K | L | O | R | R | G | W | D | T | A | Y | I | N | I | R | L | S | A | G | L | A |
| PROIMIA1   | DL  | W   | D   | A   | T   | F   | F | C | G | S | C | A | I | L | R | R | E | A | L | E | E | N | D | G | F | S | G | E | T | V | T | E | D | A | H | T | A | L | K | L | O | R | R | G | W | D | T | A | Y | I | N | I | R | L | S | A | G | L | A |
| NCIMB11163 | DL  | W   | D   | A   | T   | F   | F | C | G | S | C | A | I | L | R | R | E | A | L | E | E | N | D | G | F | S | G | E | T | V | T | E | D | A | H | T | A | L | K | L | O | R | R | G | W | D | T | A | Y | I | N | I | R | L | S | A | G | L | A |
| CP1        | DL  | W   | D   | A   | T   | F   | F | C | G | S | C | A | I | L | R | R | E | A | L | E | E | N | D | G | F | S | G | E | T | V | T | E | D | A | H | T | A | L | K | L | O | R | R | G | W | D | T | A | Y | I | N | I | R | L | S | A | G | L | A |
| B1960      | DL  | W   | D   | A   | T   | F   | F | C | G | S | C | A | I | L | R | R | E | A | L | E | E | N | D | G | F | S | G | E | T | V | T | E | D | A | H | T | A | L | K | L | O | R | R | G | W | D | T | A | Y | I | N | I | R | L | S | A | G | L | A |
| ATCC31822  | DL  | W   | D   | A   | T   | F   | F | C | G | S | C | A | I | L | R | R | E | A | L | E | E | N | D | G | F | S | G | E | T | V | T | E | D | A | H | T | A | L | K | L | O | R | R | G | W | D | T | A | Y | I | N | I | R | L | S | A | G | L | A |
| CP4        | DL  | W   | D   | A   | T   | F   | F | C | G | S | C | A | I | L | R | R | E | A | L | E | E | N | D | G | F | S | G | E | T | V | T | E | D | A | H | T | A | L | K | L | O | R | R | G | W | D | T | A | Y | I | N | I | R | L | S | A | G | L | A |
| B12526     | DL  | W   | D   | A   | T   | F   | F | C | G | S | C | A | I | L | R | R | E | A | L | E | E | N | D | G | F | S | G | E | T | V | T | E | D | A | H | T | A | L | K | L | O | R | R | G | W | D | T | A | Y | I | N | I | R | L | S | A | G | L | A |
| CP3        | DL  | W   | D   | A   | T   | F   | F | C | G | S | C | A | I | L | R | R | E | A | L | E | E | N | D | G | F | S | G | E | T | V | T | E | D | A | H | T | A | L | K | L | O | R | R | G | W | D | T | A | Y | I | N | I | R | L | S | A | G | L | A |

|            | 370 | 380 | 390 | 400 | 410 | 420 |   |   |   |   |   |   |   |   |   |   |   |   |   |   |   |   |   |   |   |   |   |   |   |   |   |   |   |   |   |   |   |   |   |   |   |   |   |   |   |   |   |   |   |   |   |   |   |   |   |   |   |   |   |   |
|------------|-----|-----|-----|-----|-----|-----|---|---|---|---|---|---|---|---|---|---|---|---|---|---|---|---|---|---|---|---|---|---|---|---|---|---|---|---|---|---|---|---|---|---|---|---|---|---|---|---|---|---|---|---|---|---|---|---|---|---|---|---|---|---|
| francensis | T   | D   | T   | L   | L   | A   | H | I | K | O | R | A | R | W | A | R | G | M | T | O | I | L | R | V | D | N | P | L | W | G | R | G | L | T | I | A | O | R | L | C | Y | M | N | A | L | L | H | Y | O | F | A | L | P | R | V | I | F | L | I | S |
| ATTC10988  | T   | D   | T   | L   | L   | A   | H | I | K | O | R | A | R | W | A | R | G | M | T | O | I | L | R | V | D | N | P | L | W | G | R | G | L | T | I | A | O | R | L | C | Y | M | N | A | L | L | H | Y | O | F | A | L | P | R | V | I | F | L | I | S |
| CUI        | T   | D   | T   | L   | L   | A   | H | I | K | O | R | A | R | W | A | R | G | M | T | O | I | L | R | V | D | N | P | L | W | G | R | G | L | T | I | A | O | R | L | C | Y | M | N | A | L | L | H | Y | O | F | A | L | P | R | V | I | F | L | I | S |
| CUIrif2    | T   | D   | T   | L   | L   | A   | H | I | K | O | R | A | R | W | A | R | G | M | T | O | I | L | R | V | D | N | P | L | W | G | R | G | L | T | I | A | O | R | L | C | Y | M | N | A | L | L | H | Y | O | F | A | L | P | R | V | I | F | L | I | S |
| uvs51      | T   | D   | T   | L   | L   | A   | H | I | K | O | R | A | R | W | A | R | G | M | T | O | I | L | R | V | D | N | P | L | W | G | R | G | L | T | I | A | O | R | L | C | Y | M | N | A | L | L | H | Y | O | F | A | L | P | R | V | I | F | L | I | S |
| B23394     | T   | D   | T   | L   | L   | A   | H | I | K | O | R | A | R | W | A | R | G | M | T | O | I | L | R | V | D | N | P | L | W | G | R | G | L | T | I | A | O | R | L | C | Y | M | N | A | L | L | H | Y | O | F | A | L | P | R | V | I | F | L | I | S |
| Z6         | T   | D   | T   | L   | L   | A   | H | I | K | O | R | A | R | W | A | R | G | M | T | O | I | L | R | V | D | N | P | L | W | G | R | G | L | T | I | A | O | R | L | C | Y | M | N | A | L | L | H | Y | O | F | A | L | P | R | V | I | F | L | I | S |
| B4492      | T   | D   | T   | L   | L   | A   | H | I | K | O | R | A | R | W | A | R | G | M | T | O | I | L | R | V | D | N | P | L | W | G | R | G | L | T | I | A | O | R | L | C | Y | M | N | A | L | L | H | Y | O | F | A | L | P | R | V | I | F | L | I |   |

490 500 510 520 530 540  
francensis PTLITIFLNPKKGSFNVTDKGERMEDDYFDIRSVRPHLITAGFLFLGLVVGIVKLIYSSYF  
ATTC10988 PTLITIFLNPKKGSFNVTDKGERMEDDYFDIQSARPHLITAGFLFLGLVVGIVKLIYSSYF  
CU1 PTLITIFLNPKKGSFNVTDKGERMEDDYFDIQSARPHLITAGFLFLGLVVGIVKLIYSSYF  
CU1rif2 PTLITIFLNPKKGSFNVTDKGERMEDDYFDIQSARPHLITAGFLFLGLVVGIVKLIYSSYF  
uvs51 PTLITIFLNPKKGSFNVTDKGERMEDDYFDIRSVRPHLITAGFLFLGLVVGIVKLIYSSYF  
B23394 PTLITIFLNPKKGSFNVTDKGERMEDDYFDIRSVRPHLITAGFLFLGLVVGIVKLIYSSYF  
Z6 PTLITIFLNPKKGSFNVTDKGERMEDDYFDIRSVRPHLITAGFLFLGLVVGIVKLIYSSYF  
B4492 PTLITIFLNPKKGSFNVTDKGERMEDDYFDIRSVRPHLITAGFLFLGLVVGIVKLIYSSYF  
PROIMIA1 PTLITIFLNPKKGSFNVTDKGERMEDDYFDIRSVRPHLITAGFLFLGLVVGIVKLIYSSYF  
NCIMB11163 PTLITIFLNPKKGSFNVTDKGERMEDDYFDIRSVRPHLITAGFLFLGLVVGIVKLIYSSYF  
CP1 PTLITIFLNPKKGSFNVTDKGERMEDDYFDIRSVRPHLITAGFLFLGLVVGIVKLIYSSYF  
B1960 PTLITIFLNPKKGSFNVTDKGERMEDDYFDIRSVRPHLITAGFLFLGLVVGIVKLIYSSYF  
ATCC31822 PTLITIFLNPKKGSFNVTDKGERMEDDYFDIRSVRPHLITAGFLFLGLVVGIVKLIYSSYF  
CP4 PTLITIFLNPKKGSFNVTDKGERMEDDYFDIRSVRPHLITAGFLFLGLVVGIVKLIYSSYF  
B12526 PTLITIFLNPKKGSFNVTDKGERMEDDYFDIRSVRPHLITAGFLFLGLVVGIVKLIYSSYF  
CP3 PTLITIFLNPKKGSFNVTDKGERMEDDYFDIRSVRPHLITAGFLFLGLVVGIVKLIYSSYF

550 560 570 580 590 600  
francensis HIQPSVLVLNVTWASFNFIILLASTAVAHESSROIRNTVRFPPRIPEITAYFEDGHVIDSVT  
ATTC10988 HIQPSVLVLNVTWASFNFIILLASTAVAHESSROIRNTVRFPPRIPEITAYFEDGHVIDSVT  
CU1 HIQPSVLVLNVTWASFNFIILLASTAVAHESSROIRNTVRFPPRIPEITAYFEDGHVIDSVT  
CU1rif2 HIQPSVLVLNVTWASFNFIILLASTAVAHESSROIRNTVRFPPRIPEITAYFEDGHVIDSVT  
uvs51 HIQPSVLVLNVTWASFNFIILLASTAVAHESSROIRNTVRFPPRIPEITAYFEDGHVIDSVT  
B23394 HIQPSVLVLNVTWASFNFIILLASTAVAHESSROIRNTVRFPPRIPEITAYFEDGHVIDSVT  
Z6 HIQPSVLVLNVTWASFNFIILLASTAVAHESSROIRNTVRFPPRIPEITAYFEDGHVIDSVT  
B4492 HIQPSVLVLNVTWASFNFIILLASTAVAHESSROIRNTVRFPPRIPEITAYFEDGHVIDSVT  
PROIMIA1 HIQPSVLVLNVTWASFNFIILLASTAVAHESSROIRNTVRFPPRIPEITAYFEDGHVIDSVT  
NCIMB11163 HIQPSVLVLNVTWASFNFIILLASTAVAHESSROIRNTVRFPPRIPEITAYFEDGHVIDSVT  
CP1 HIQPSVLVLNVTWASFNFIILLASTAVAHESSROIRNTVRFPPRIPEITAYFEDGHVIDSVT  
B1960 HIQPSVLVLNVTWASFNFIILLASTAVAHESSROIRNTVRFPPRIPEITAYFEDGHVIDSVT  
ATCC31822 HIQPSVLVLNVTWASFNFIILLASTAVAHESSROIRNTVRFPPRIPEITAYFEDGHVIDSVT  
CP4 HIQPSVLVLNVTWASFNFIILLASTAVAHESSROIRNTVRFPPRIPEITAYFEDGHVIDSVT  
B12526 HIQPSVLVLNVTWASFNFIILLASTAVAHESSROIRNTVRFPPRIPEITAYFEDGHVIDSVT  
CP3 HIQPSVLVLNVTWASFNFIILLASTAVAHESSROIRNTVRFPPRIPEITAYFEDGHVIDSVT

610 620 630 640 650 660  
francensis DNISLGGGLAFSLPKNYELADRDITSEISMKVDNRSFALPTKIVSKSGSLVRLQFEAASMPE  
ATTC10988 DNISLGGGLAFSLPKNYELADRDITSEISMKVDNRSFALPTKIVSKSGSLVRLQFEAASMPE  
CU1 DNISLGGGLAFSLPKNYELADRDITSEISMKVDNRSFALPTKIVSKSGSLVRLQFEAASMPE  
CU1rif2 DNISLGGGLAFSLPKNYELADRDITSEISMKVDNRSFALPTKIVSKSGSLVRLQFEAASMPE  
uvs51 DNISLGGGLAFSLPKNYELADRDITSEISMKVDNRSFALPTKIVSKSGSLVRLQFEAASMPE  
B23394 DNISLGGGLAFSLPKNYELADRDITSEISMKVDNRSFALPTKIVSKSGSLVRLQFEAASMPE  
Z6 DNISLGGGLAFSLPKNYELADRDITSEISMKVDNRSFALPTKIVSKSGSLVRLQFEAASMPE  
B4492 DNISLGGGLAFSLPKNYELADRDITSEISMKVDNRSFALPTKIVSKSGSLVRLQFEAASMPE  
PROIMIA1 DNISLGGGLAFSLPKNYELADRDITSEISIF .....  
NCIMB11163 DNISLGGGLAFSLPKNYELADRDITSEISMKVDNRSFALPTKIVSKSGSLVRLQFEAASMPE  
CP1 DNISLGGGLAFSLPKNYELADRDITSEISMKVDNRSFALPTKIVSKSGSLVRLQFEAASMPE  
B1960 DNISLGGGLAFSLPKNYELADRDITSEISMKVDNRSFALPTKIVSKSGSLVRLQFEAASMPE  
ATCC31822 DNISLGGGLAFSLPKNYELADRDITSEISMKVDNRSFALPTKIVSKSGSLVRLQFEAASMPE  
CP4 DNISLGGGLAFSLPKNYELADRDITSEISMKVDNRSFALPTKIVSKSGSLVRLQFEAASMPE  
B12526 DNISLGGGLAFSLPKNYELADRDITSEISMKVDNRSFALPTKIVSKSGSLVRLQFEAASMPE  
CP3 DNISLGGGLAFSLPKNYELADRDITSEISMKVDNRSFALPTKIVSKSGSLVRLQFEAASMPE

670 680 690 700 710 720  
francensis QKKLVAALMGQADAWLHYGPEEKPVSTIASMKHILKIFGLLRYRPQKRINKKAAIKNEK  
ATTC10988 QKKLVAALMGQADAWLHYGPEEKPVSTIASMKHILKIFGLLRYRPQKRINKKAAIKNEK  
CU1 QKKLVAALMGQADAWLHYGPEEKPVSTIASMKHILKIFGLLRYRPQKRINKKAAIKNEK  
CU1rif2 QKKLVAALMGQADAWLHYGPEEKPVSTIASMKHILKIFGLLRYRPQKRINKKAAIKNEK  
uvs51 QKKLVAALMGQADAWLHYGPEEKPVSTIASMKHILKIFGLLRYRPQKRINKKAAIKNEK  
B23394 QKKLVAALMGQADAWLHYGPEEKPVSTIASMKHILKIFGLLRYRPQKRINKKAAIKNEK  
Z6 QKKLVAALMGQADAWLHYGPEEKPVSTIASMKHILKIFGLLRYRPQKRINKKAAIKNEK  
B4492 QKKLVAALMGQADAWLHYGPEEKPVSTIASMKHILKIFGLLRYRPQKRINKKAAIKNEK  
PROIMIA1 .....  
NCIMB11163 QKKLVAALMGQADAWLHYGPEEKPVSTIASMKHILKIFGLLRYRPQKRINKKAAIKNEK  
CP1 QKKLVAALMGQADAWLHYGPEEKPVSTIASMKHILKIFGLLRYRPQKRINKKAAIKNEK  
B1960 QKKLVAALMGQADAWLHYGPEEKPVSTIASMKHILKIFGLLRYRPQKRINKKAAIKNEK  
ATCC31822 QKKLVAALMGQADAWLHYGPEEKPVSTIASMKHILKIFGLLRYRPQKRINKKAAIKNEK  
CP4 QKKLVAALMGQADAWLHYGPEEKPVSTIASMKHILKIFGLLRYRPQKRINKKAAIKNEK  
B12526 QKKLVAALMGQADAWLHYGPEEKPVSTIASMKHILKIFGLLRYRPQKRINKKAAIKNEK  
CP3 QKKLVAALMGQADAWLHYGPEEKPVSTIASMKHILKIFGLLRYRPQKRINKKAAIKNEK

|            |              |
|------------|--------------|
| francensis | <u>GAVQK</u> |
| ATTC10988  | GAVKK        |
| CU1        | GAVKK        |
| CU1rif2    | GAVKK        |
| uvs51      | GAVKK        |
| B23394     | GAVKK        |
| Z6         | GAVKK        |
| B4492      | GAVKK        |
| PROIMIA1   | .....        |
| NCIMB11163 | GAVKK        |
| CP1        | GAVKK        |
| B1960      | GAVKK        |
| ATCC31822  | GAVKK        |
| CP4        | GAVKK        |
| B12526     | GAVKK        |
| CP3        | <u>GAVKK</u> |
